# Supplementary material for: Enhancing molecular property prediction via transformer with dual graph representation
Source: Research Square preprint supplement (doi:10.21203/rs.3.rs-8164763/v1), 2025-12-09
Supplement: Supplementary file 1 [file 3e30476e058a3161501a5d68.docx]

**Supplementary Information**

**Enhancing molecular property prediction via transformer with dual graph representation**

Shuyuan Zhang1,2,* and Alexei A. Lapkin1,2

1Department of Chemical Engineering and Biotechnology, University of Cambridge, Philippa Fawcett Drive, Cambridge, CB3 0AS, UK

2Innovation Centre in Digital Molecular Technologies, Yusuf Hamied Department of Chemistry, University of Cambridge, Lensfield Road, Cambridge, CB2 1EW, UK

*Corresponding author.

E-mail address: sz469@cam.ac.uk

Table of Contents

[1. Graph-specific encodings 3](#_Toc207324307)

[2. 3D Geometric embedding 4](#_Toc207324308)

[3. DGT layer architecture 5](#_Toc207324309)

[4. Dataset information 6](#_Toc207324310)

[5. Units for QM9 tasks 7](#_Toc207324311)

[6. Performance benchmark details 8](#_Toc207324312)

[6.1 Detailed performance benchmark of DGT in the physiology domain 8](#_Toc207324313)

[6.2 Detailed performance benchmark of DGT in the biophysics domain 8](#_Toc207324314)

[6.3 Detailed performance benchmark of DGT in the physical chemistry domain 9](#_Toc207324315)

[6.4 Detailed performance benchmark of DGT in the quantum mechanics domain 10](#_Toc207324316)

[7. DGT configurations for all tasks 11](#_Toc207324317)

[8. Detailed performance comparison of DGT(3D) against other models 11](#_Toc207324318)

[9. Attention-based interpretation 11](#_Toc207324319)

# 1. Graph-specific encodings

Relative position encoding (RPE)1 and ring structural encoding (RSE)2 are involved to introduce topological and molecular modular features to the attention mechanism calculation. Shortest path distance encoding (SPDE)3 and random walk positional encoding (RWPE)4 are employed as the RPE of nodes.

In SPDE, a node–node pair is assigned an embedding vector derived from the length of its shortest path in the underlying molecular graph. SPDE encodes higher-order connectivity patterns by differentiating between nodes that are directly connected, separated by a few edges, or positioned further apart in the molecular graph. Such a representation provides a natural means of integrating long-range structural information. In DGT, shortest-path distances are mapped to a discrete embedding space using learnable vectors, enabling the model to assign distinct representations to different edge lengths (e.g., 1-hop, 2-hop, etc.) while retaining the flexibility to adapt during training.

In RWPE, the position of a node is encoded by the distribution of random walks originating from it, integrating multi-hop connectivity patterns into the embedding space. RWPE is able to provide a probabilistic description of a node’s neighborhood that naturally reflects both local and global graph topology. Formally, we consider the random walk transition matrix , where is the adjacent matrix of the graph and is the degree matrix. The k-step random walk distribution can be then given as . The embedding for a node–node pair is obtained by aggregating its visitation probabilities over multiple walk lengths. This construction yields positional features that are permutation-equivariant and expressive for downstream neural architectures.

The representation of cyclic substructures plays a critical role in molecular machine learning, as conventional atom- and bond-level graph embeddings often fail to capture the higher-order connectivity and geometric constraints imposed by ring systems. By embedding the ring size as learnable vectors, we introduce RSE to encode ring systems as distinct, information-rich entities within molecular graphs, producing a latent representation that complements the node-level embedding.


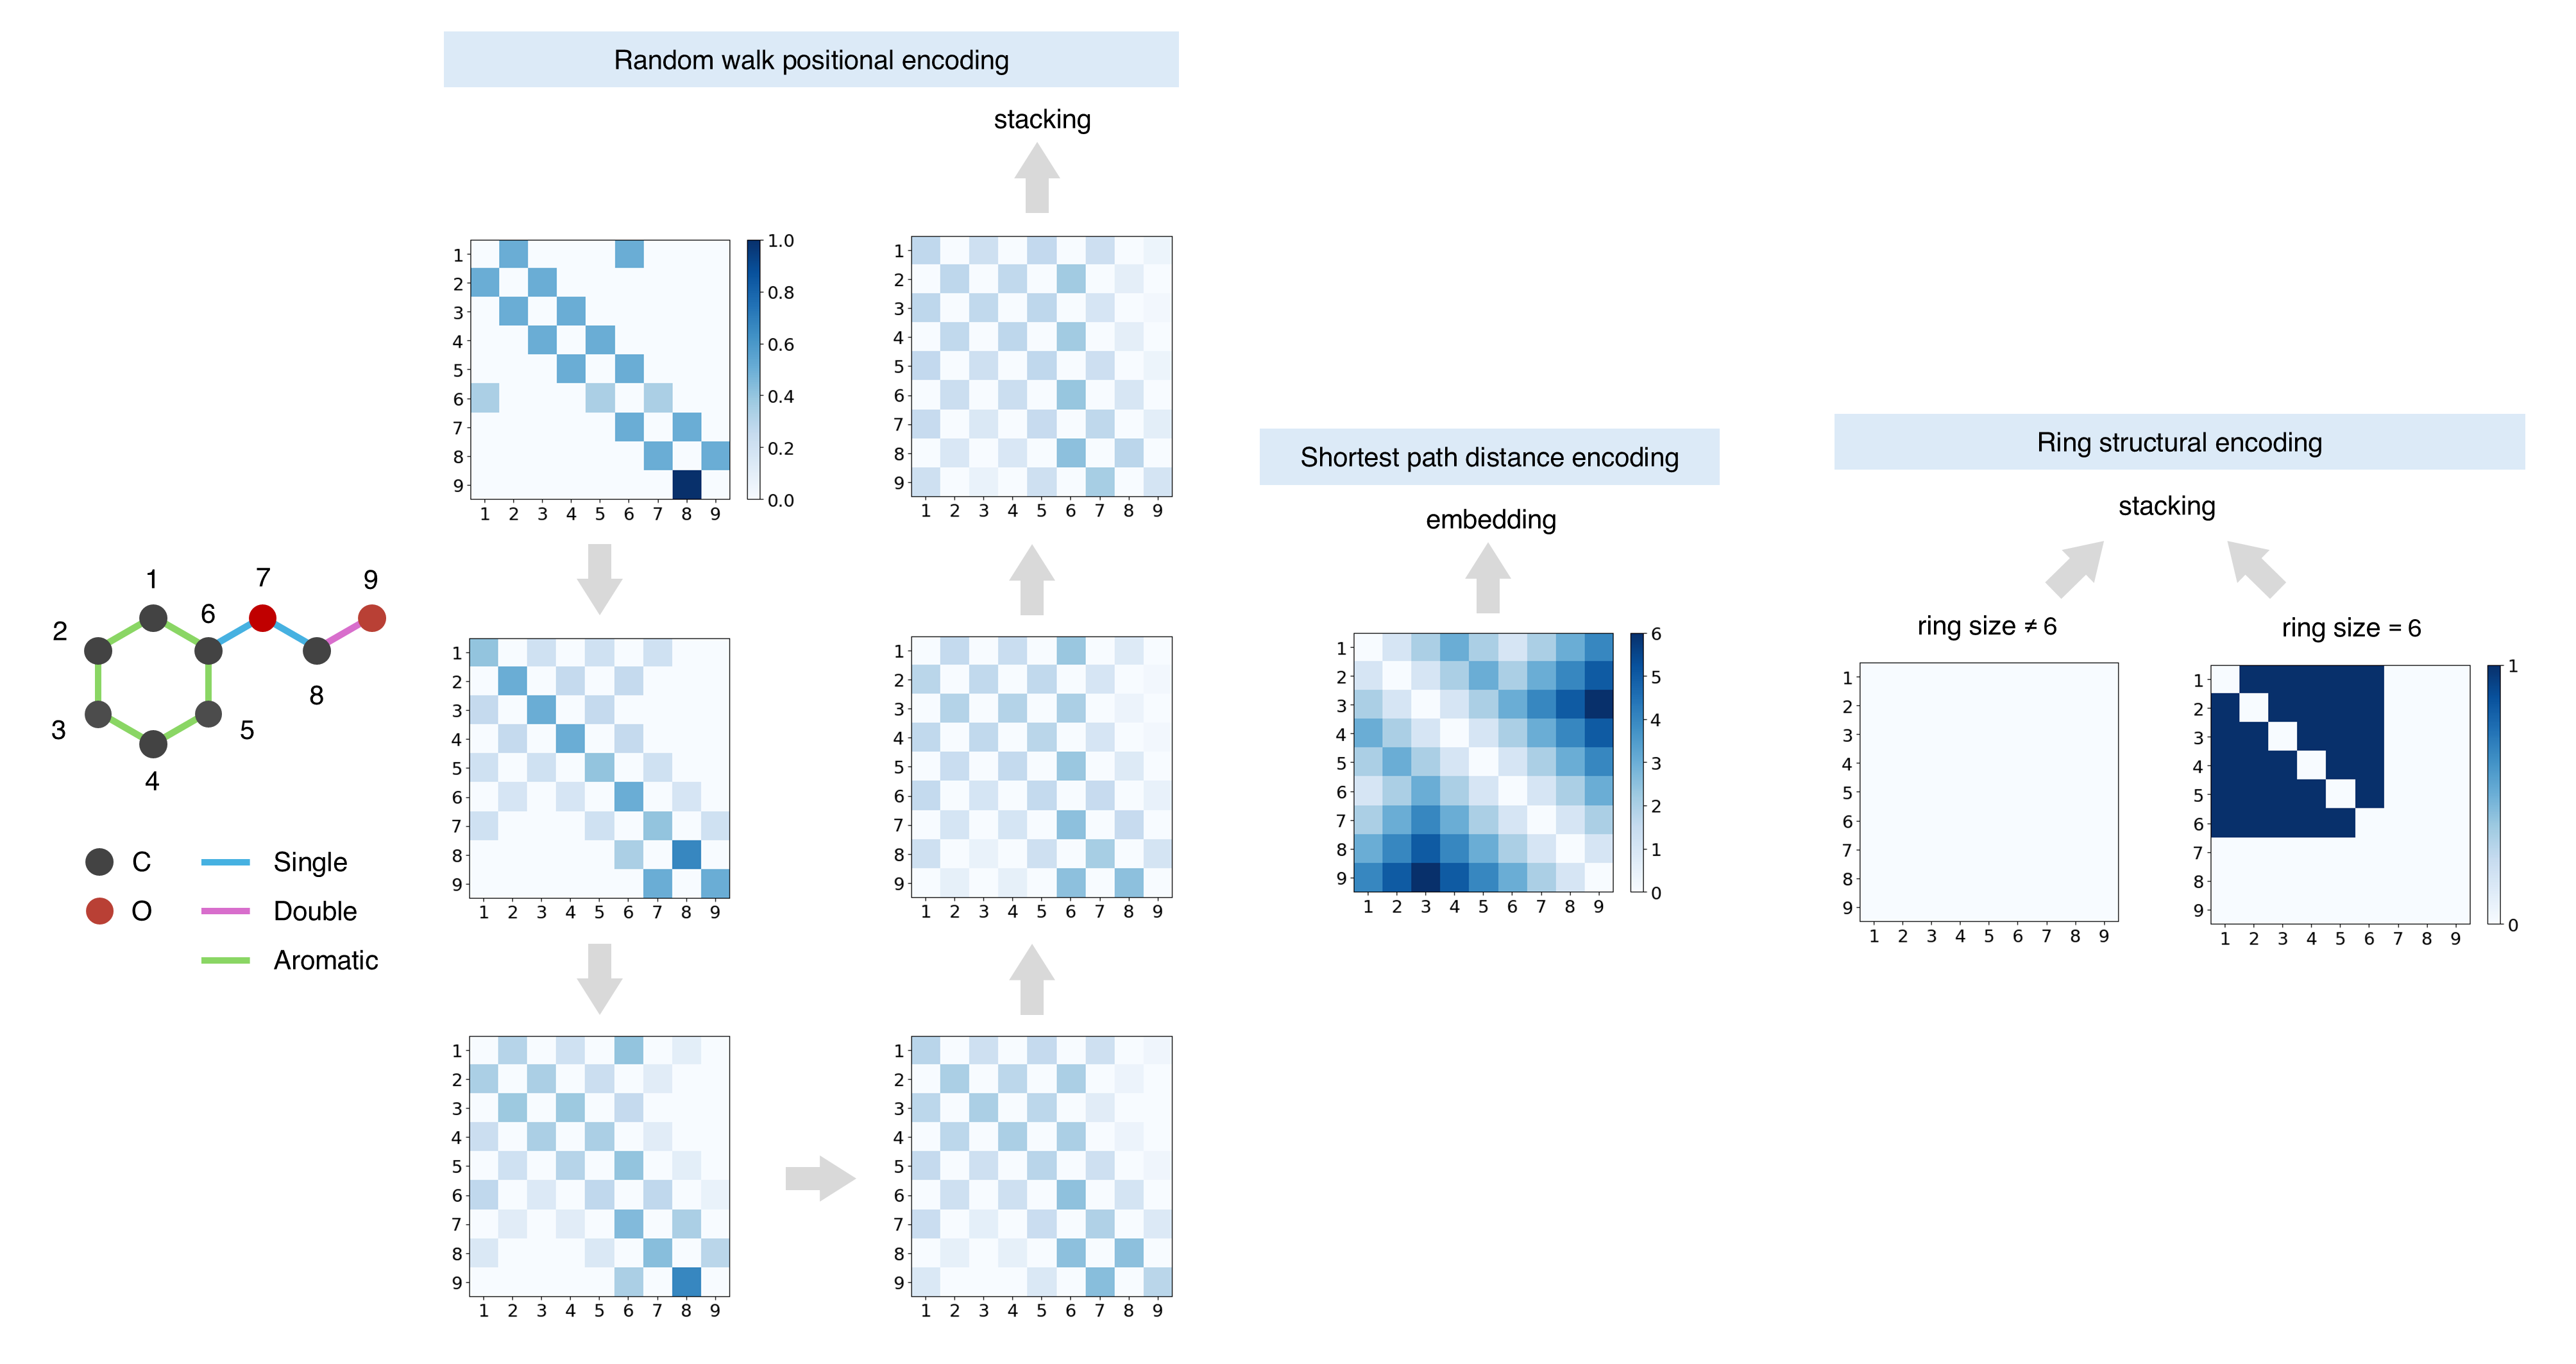


**Supplementary Fig. 1.** Illustration of graph-specific encodings of the example phenyl formate molecule. Random walk positional and shortest path distance encodings are included as relative positional encodings. Rings of different sizes are identified in the molecule and then stacked as node–node pairwise features.

# 2. 3D geometric embedding

The representation of continuous geometric information, such as atom–atom distances and bond–bond angles, in an expressive and computationally tractable form is a central challenge in molecular machine learning5. Directly using raw distances as features often fails to capture the smooth decay of interactions. To overcome these limitations, we employ enveloped Bessel functions to represent radial information between atomic pairs. Multiplication by the envelope function ensures smooth decay of the expansion near the cutoff. The radical basis function is defined as . Atom–atom interactions are excluded out of consideration if their distances are larger than . The envelop function is introduced to ensure , as well as its first and second derivatives, are equal to 0. This radial encoding allows the model to resolve fine-grained distance variations while ensuring that contributions vanish continuously at long range. Likewise, to provide an orthonormal representation of angular dependencies, normalised spherical harmonics is utilised to represent bond–bond angles.


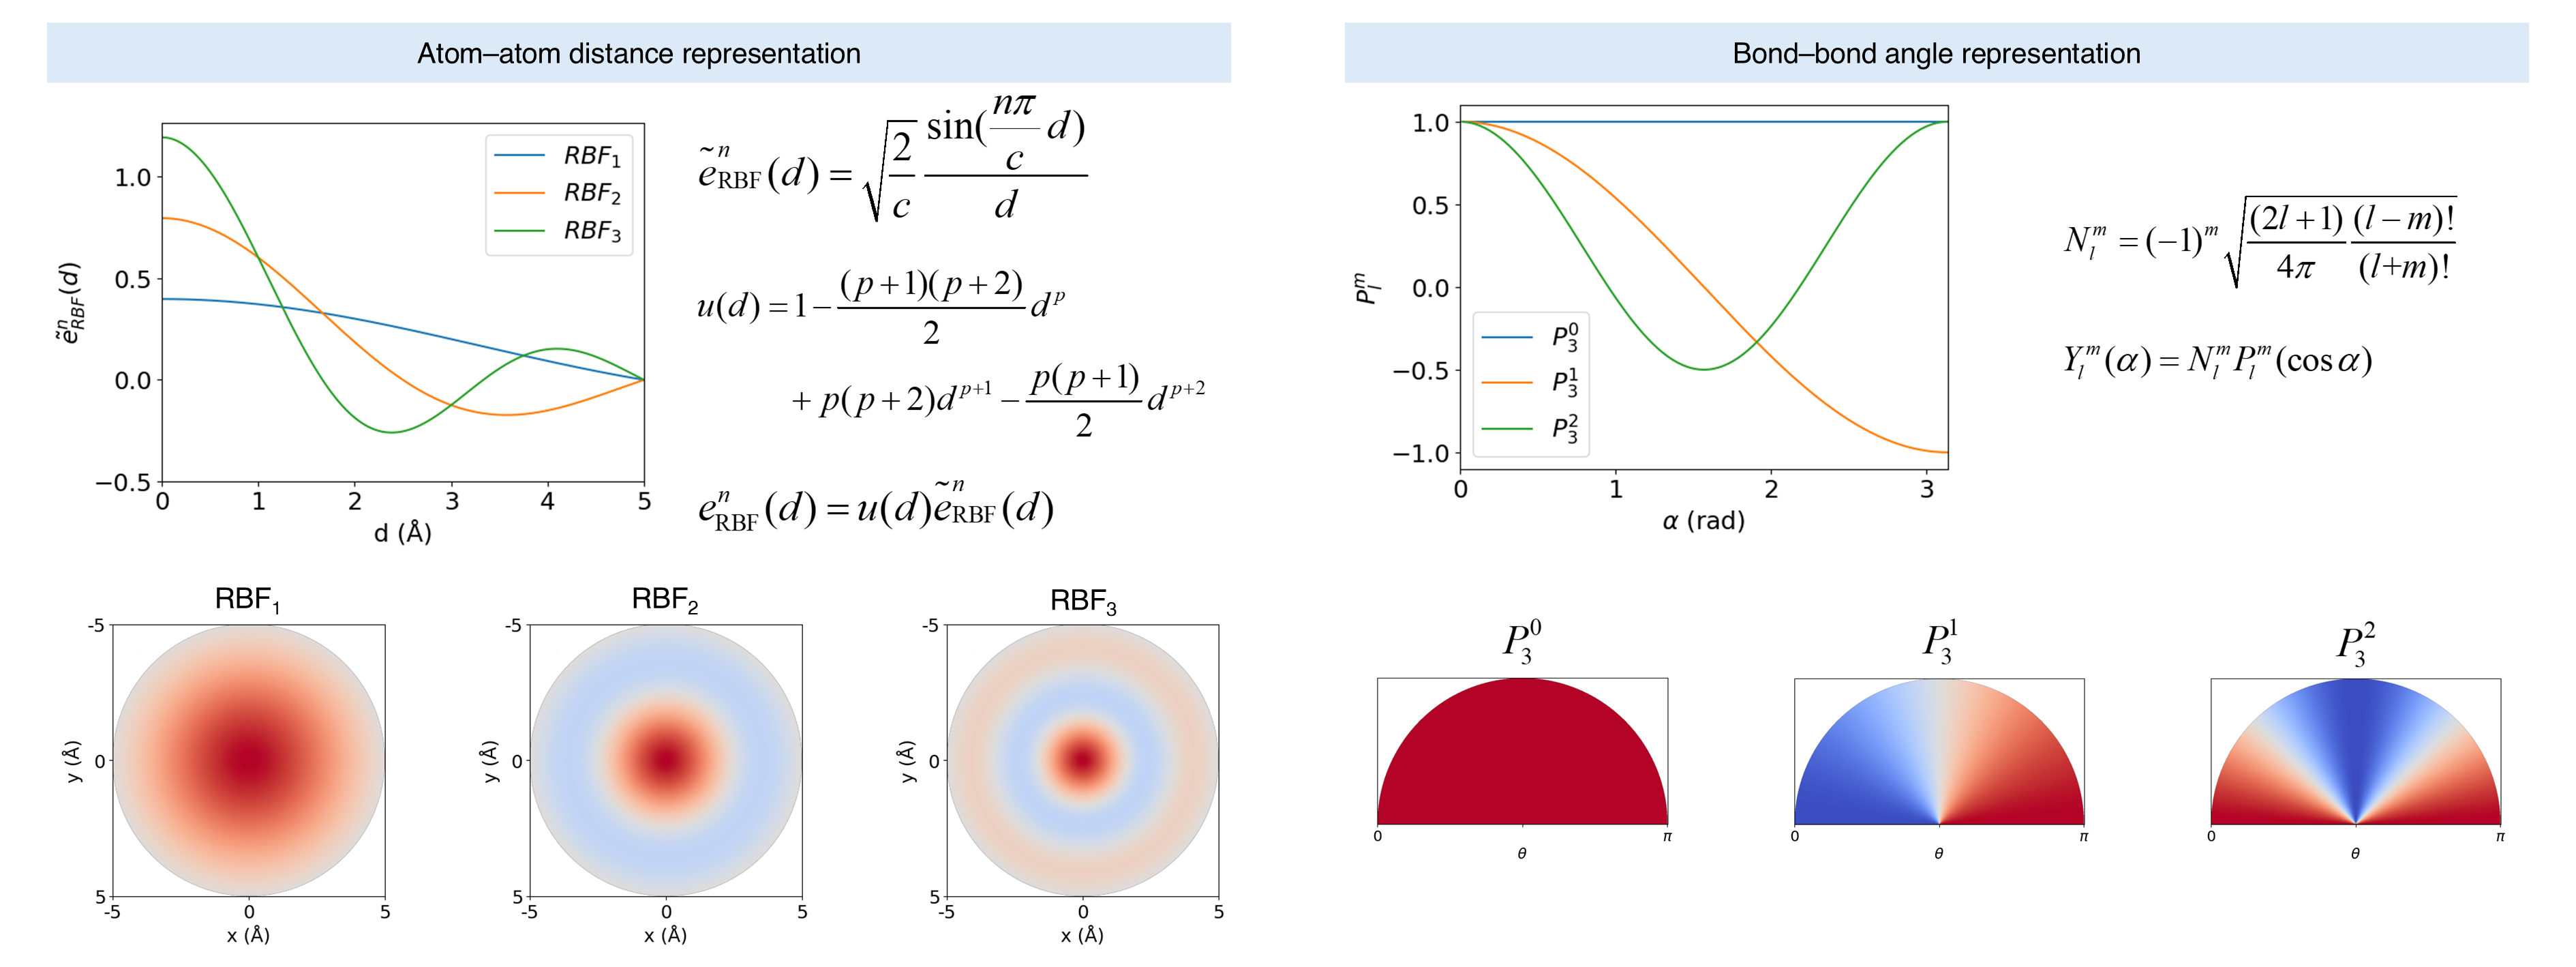


**Supplementary Fig. 2.** 3D geometric embedding of atom–atom distances and bond–bond angles. The interatomic radical distance function is embedded using an enveloped Bessel basis with a cutoff of . The envelop polynomial is introduced to ensure that and its first and second derivatives go to 0 at the cutoff. The bond–bond angle is embedded with normalised spherical harmonics , where is the pre-factor and is the associated Legendre polynomials.

# 3. DGT layer architecture

The DGT layer highlights the incorporation of node pairwise features into of the attention score and the passing message. Unlike standard self-attention mechanisms that rely on node embeddings, DGT introduces pairwise terms that encode topological and structural information between nodes for both atom and bond graphs. In practice, the attention coefficient of the layer between two nodes and is computed as

where and denote the query and key projections of the respective node embeddings, and is a learnable bias term derived from pairwise features such as SPDE, RWPE, and RSE.

During message aggregation, the pairwise features are further integrated by modulating the passing message:

Similarly, is also a learnable term derived from pairwise features such as SPDE, RWPE, and RSE for enriching the passing message.


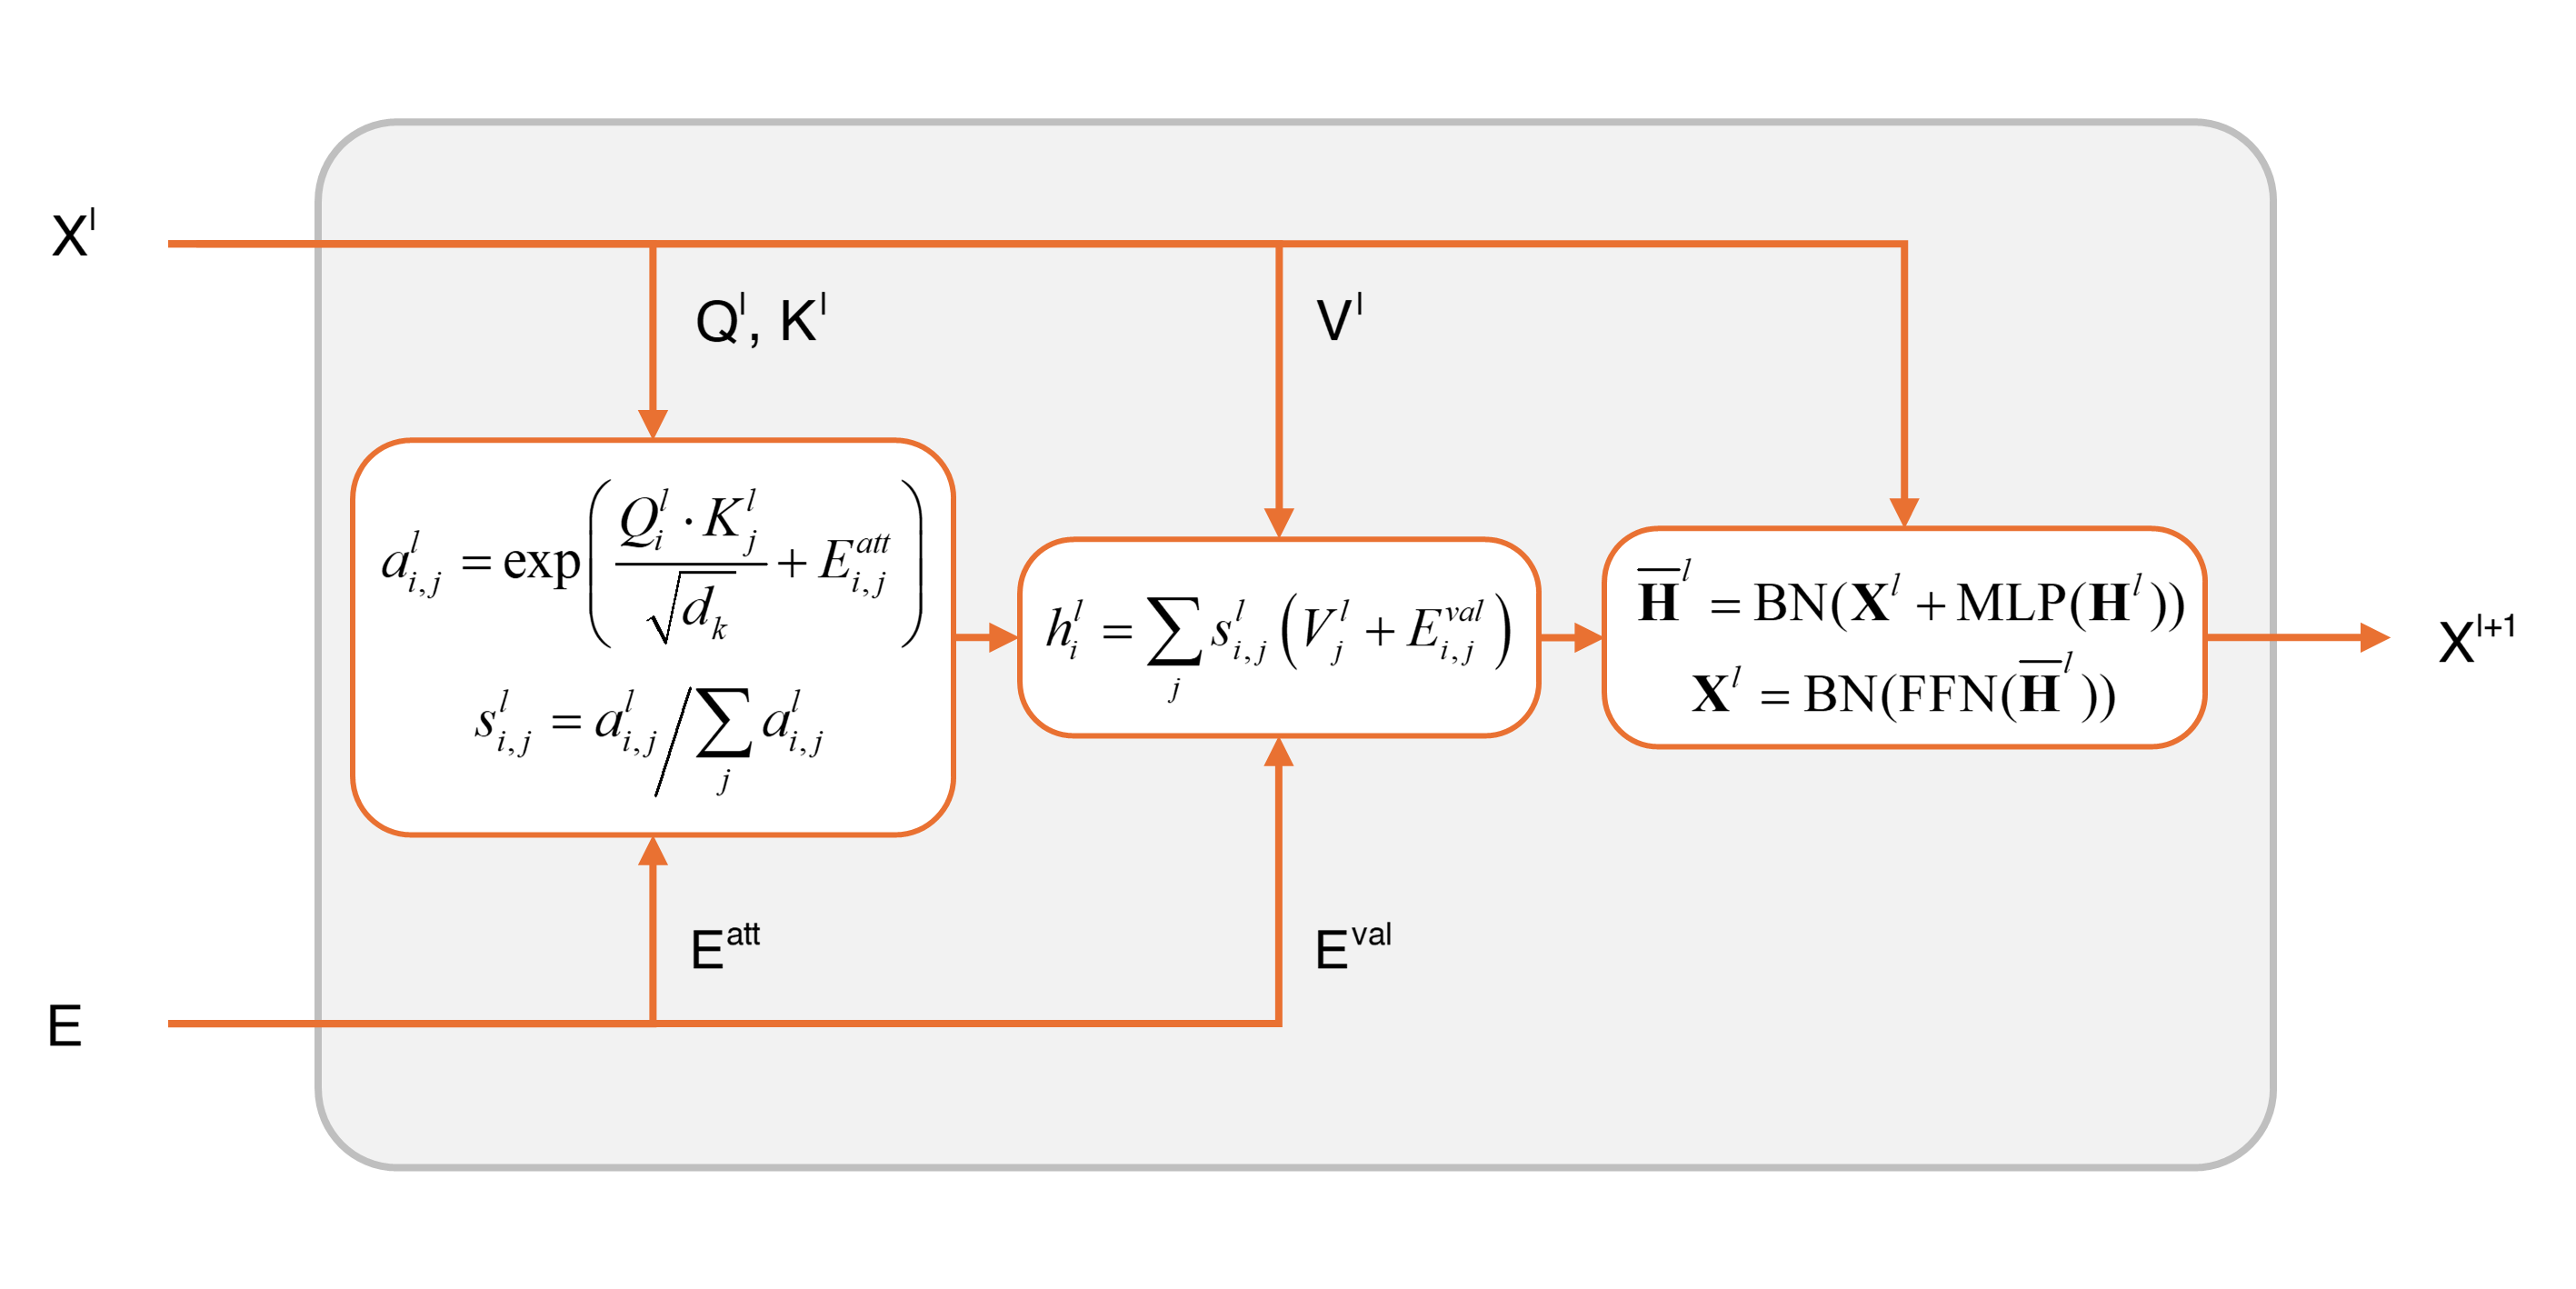


**Supplementary Fig. 3.** Detailed DGT layer architecture. This DGT layer highlights the incorporation of node–node pairwise features into both attention score calculation and passing message. Notably, only the node feature matrix is layer-wisely updated; the node–node pairwise feature matrix is the same for all DGT layers.

# 4. Dataset information

**Supplementary Table 1**. Statistical information of MoleculeNet datasets6 for benchmarking DGT.

| Domain | Dataset | Type | Tasks | Compounds | Metric |
| --- | --- | --- | --- | --- | --- |
| Physiology | BBBP | Classification | 1 | 2,053 | ROC-AUC |
| Tox21 | Classification | 12 | 8,014 | ROC-AUC |
| ClinTox | Classification | 2 | 1,491 | ROC-AUC |
| SIDER | Classification | 27 | 1,427 | ROC-AUC |
| Biophysics | BACE | Classification | 1 | 1,522 | ROC-AUC |
| HIV | Classification | 1 | 41,913 | ROC-AUC |
| Physical chemistry | ESOL | Regression | 1 | 1,128 | RMSE |
| FreeSolv | Regression | 1 | 643 | RMSE |
| Lipophilicity | Regression | 1 | 4,200 | RMSE |
| Quantum mechanics | QM9 | Regression | 12 | 133,885 | MAE |

**Supplementary Table 2**. Statistical information of the PCQM4Mv2 dataset7 and sampled subsets.

| Dataset | *Δε* average (eV) | *Δε* standard deviation (eV) | Compounds |
| --- | --- | --- | --- |
| PCQM4Mv2 | 5.6843 | 1.1646 | 3,378,606 |
| PCQM4Mv2-subset-10K | 5.6171 | 1.1169 | 10,000 |
| PCQM4Mv2-subset -100K | 5.6152 | 1.1338 | 100,000 |
| PCQM4Mv2-subset -1M | 5.6181 | 1.1382 | 1,000,000 |

# 5. Units for QM9 tasks

**Supplementary Table 3**. Units for QM9 tasks.

| QM9 task | Unit | Description |
| --- | --- | --- |
| *μ* | Debye (D) | Dipole moment |
| *α* | Bohr3 (a03) | Isotropic polarisability |
| *ε*HOMO | eV | Highest occupied molecular orbital energy |
| *ε*LUMO | eV | Lowest unoccupied molecular orbital energy |
| *Δε* | eV | Gap between *ε*HOMO and *ε*LUMO |
| 〈*R*2〉 | Bohr2 (a02) | Electronic spatial extent |
| ZPVE | eV | Zero point vibrational energy |
| *c*v | cal/(mol⋅K) | Heat capacity at 298.15 K |
| *U*0 | eV | Internal energy at 0 K |
| *U* | eV | Internal energy at 298.15 K |
| *H* | eV | Enthalpy at 298.15 K |
| *G* | eV | Free energy at 298.15 K |

# 6. Performance benchmark details

## 6.1 Detailed performance benchmark of DGT in the physiology domain


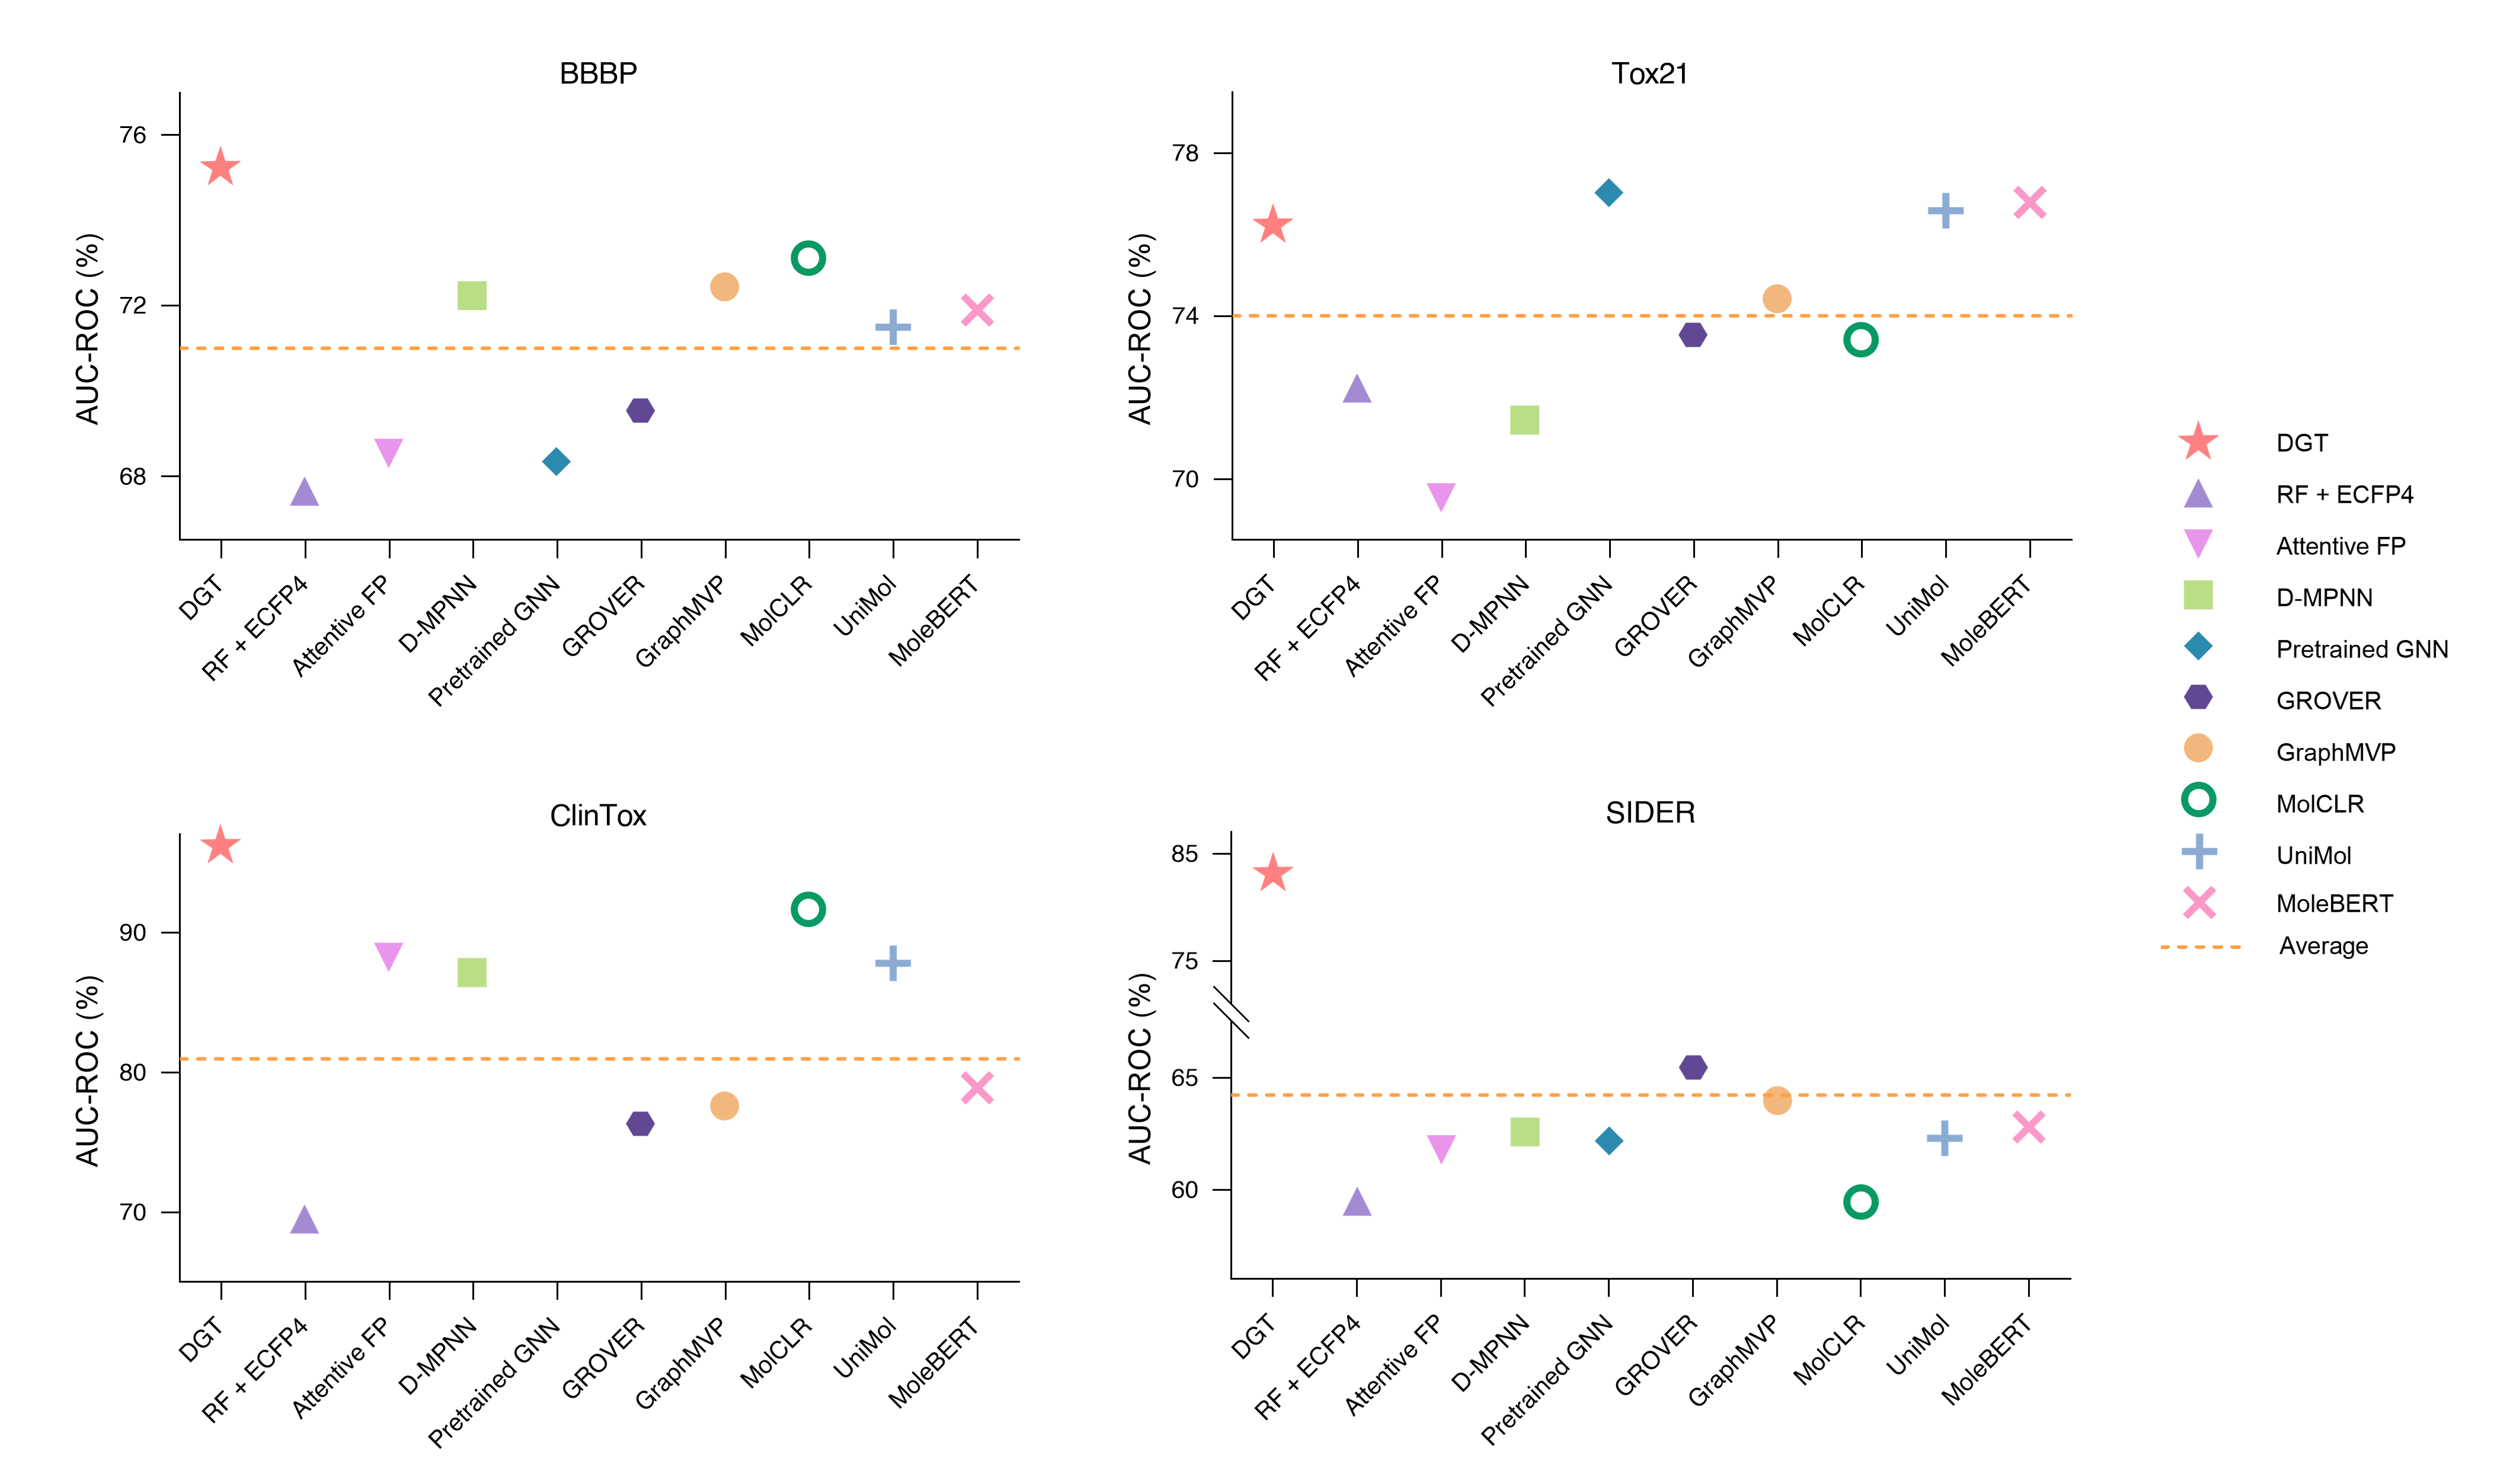


**Supplementary Fig. 4.** Detailed Performance comparison of DGT against nine baselines on BBBP, Tox21, ClinTox, and SIDER datasets within the physiology domain. DGT achieves the best performance except the Tox21 dataset, where it’s slightly inferior to Pretrained GNN, UniMol, and MolBERT.

## 6.2 Detailed performance benchmark of DGT in the biophysics domain


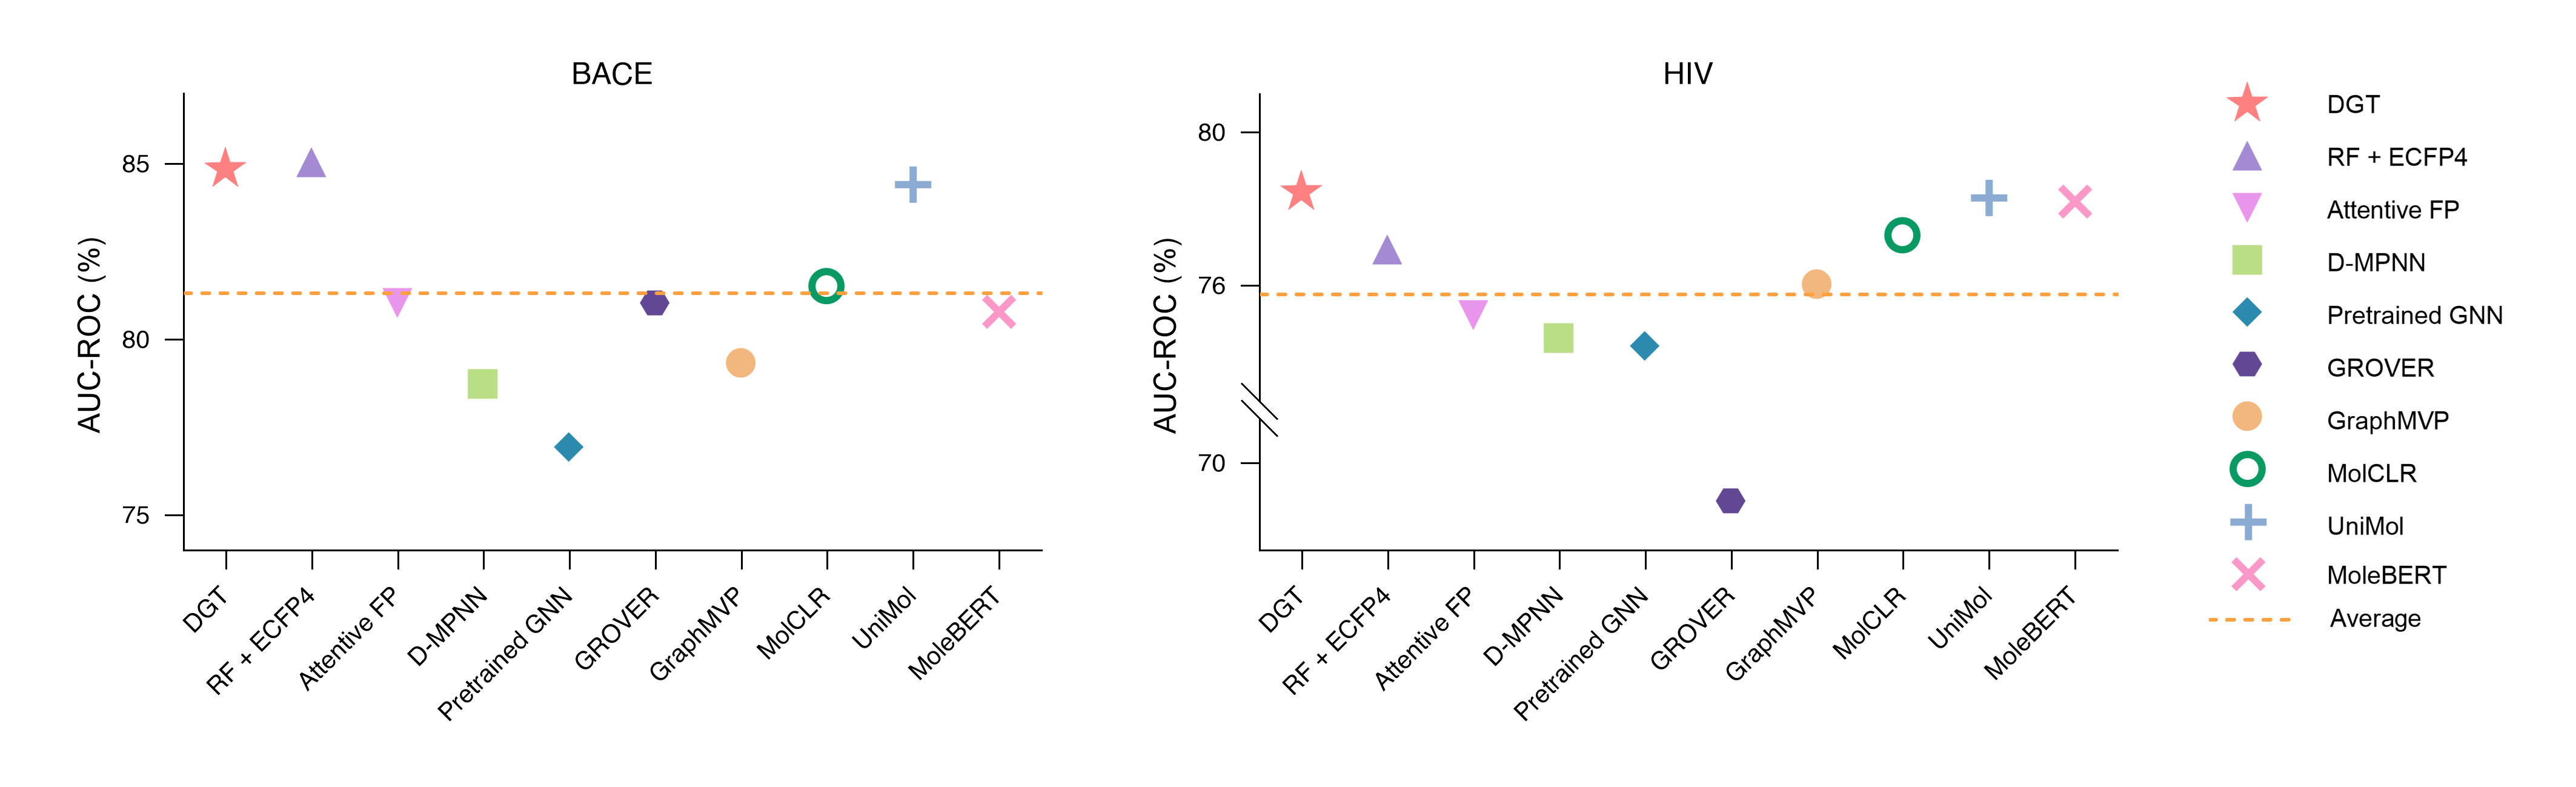


**Supplementary Fig. 5.** Detailed Performance comparison of DGT against nine baselines on BACE and HIV datasets within the biophysics domain. DGT delivers competitive performance against other best-performance models in both datasets: BACE, RF + ECFP4 and UniMol; HIV, UniMol and MoleBERT.

## 6.3 Detailed performance benchmark of DGT in the physical chemistry domain


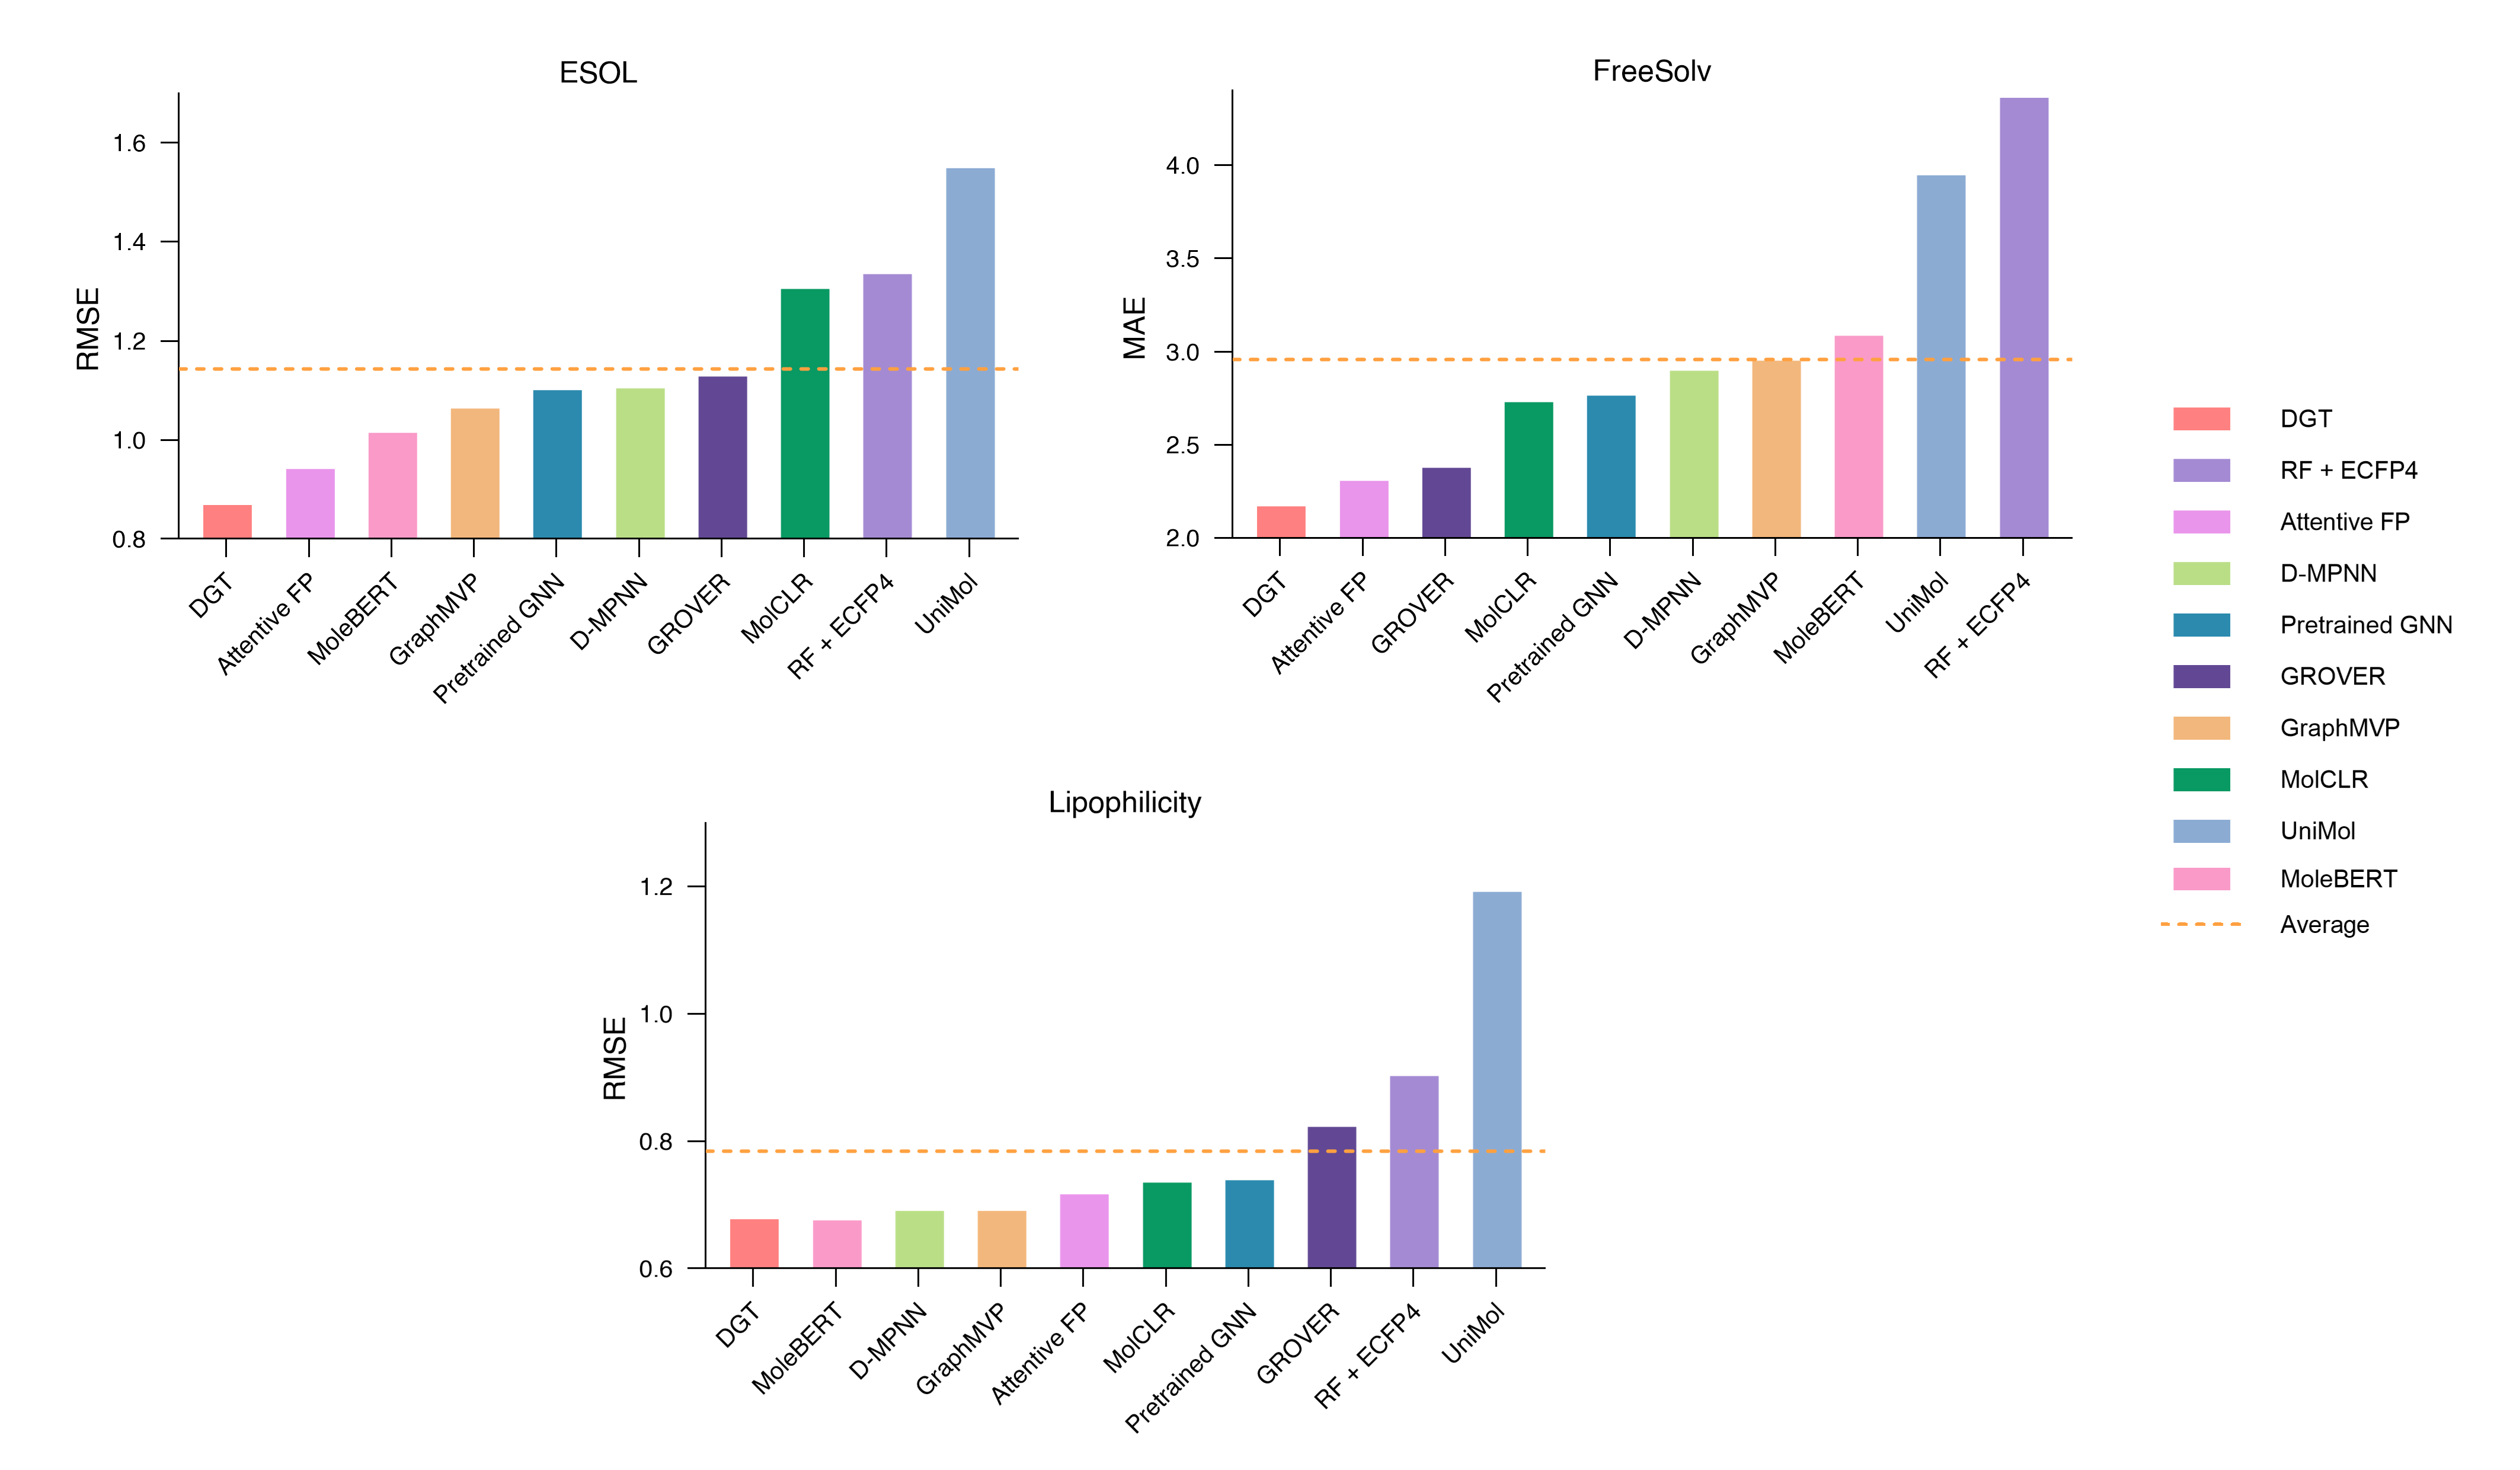


**Supplementary Fig. 6.** Detailed Performance comparison of DGT against nine baselines on ESOL, FreeSolv, and Lipophilicity datasets within the physical chemistry domain. DGT achieves the best performance except the Lipophilicity dataset, where it slightly underperforms MolBERT.

## 6.4 Detailed performance benchmark of DGT in the quantum mechanics domain


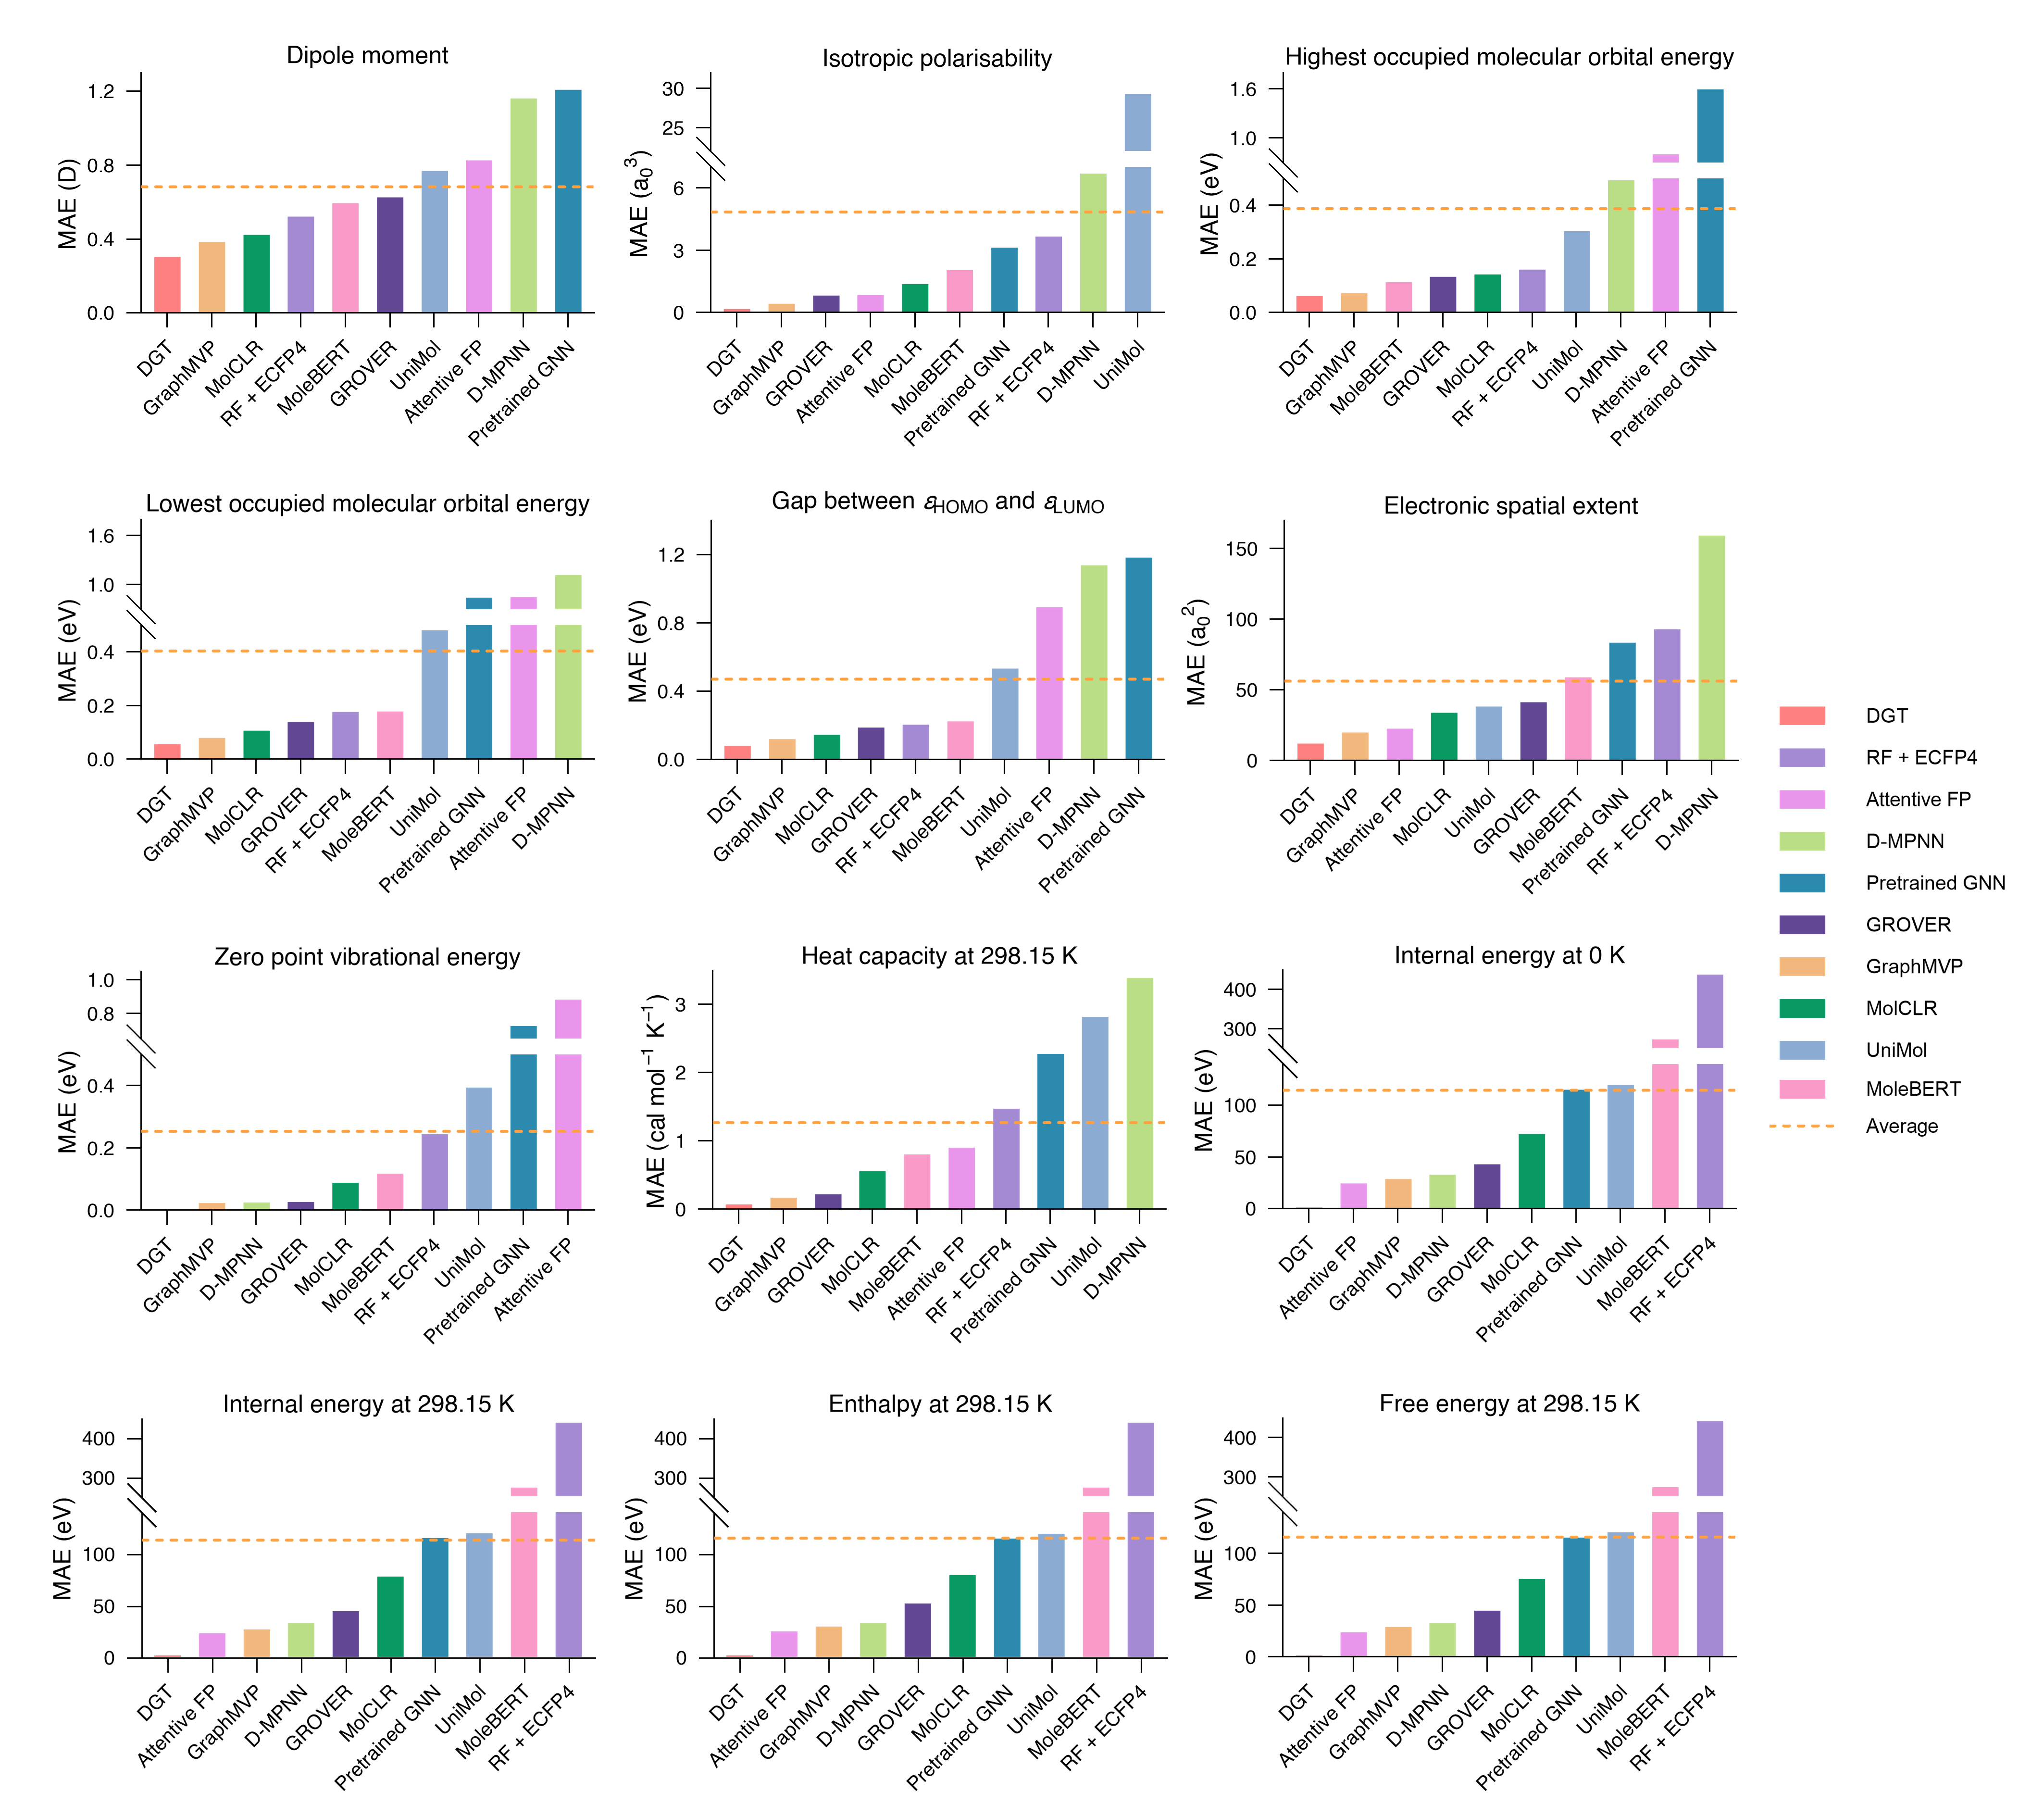


**Supplementary Fig. 7.** Detailed Performance comparison of DGT against nine baselines on the 12 tasks of the QM9 dataset within the quantum mechanics domain. DGT achieves the best performance on all tasks.

# 7. DGT configurations for all tasks

**Supplementary Table 4**. DGT configuration parameters for different datasets.

| Dataset | Batch size | Layers | Heads | Hidden size | Learning rate | Randon walk steps | Max shortest path | Max ring size |
| --- | --- | --- | --- | --- | --- | --- | --- | --- |
| BBBP | 32 | 6 | 32 | 128 | 4e-4 | 16 | 8 | 18 |
| Tox21 | 64 | 5 | 16 | 128 | 1e-4 | 16 | 8 | 18 |
| ClinTox | 64 | 5 | 8 | 64 | 5e-5 | 16 | 8 | 18 |
| SIDER | 16 | 5 | 8 | 64 | 1e-4 | 16 | 8 | 18 |
| BACE | 128 | 5 | 8 | 64 | 2e-5 | 16 | 8 | 12 |
| HIV | 32 | 5 | 8 | 64 | 2e-5 | - | 8 | 18 |
| ESOL | 128 | 6 | 16 | 64 | 5e-5 | 16 | 8 | 18 |
| FreeSolv | 64 | 3 | 16 | 128 | 5e-5 | 6 | - | 6 |
| Lipophilicity | 24 | 5 | 48 | 384 | 5e-5 | 16 | 8 | 18 |
| QM9 | 512 | 10 | 16 | 128 | 2e-4 | 16 | 8 | 18 |

DGT(3D) is applied with the same configuration parameters as DGT on the QM9 dataset.

# 8. Detailed performance comparison of DGT(3D) against other models


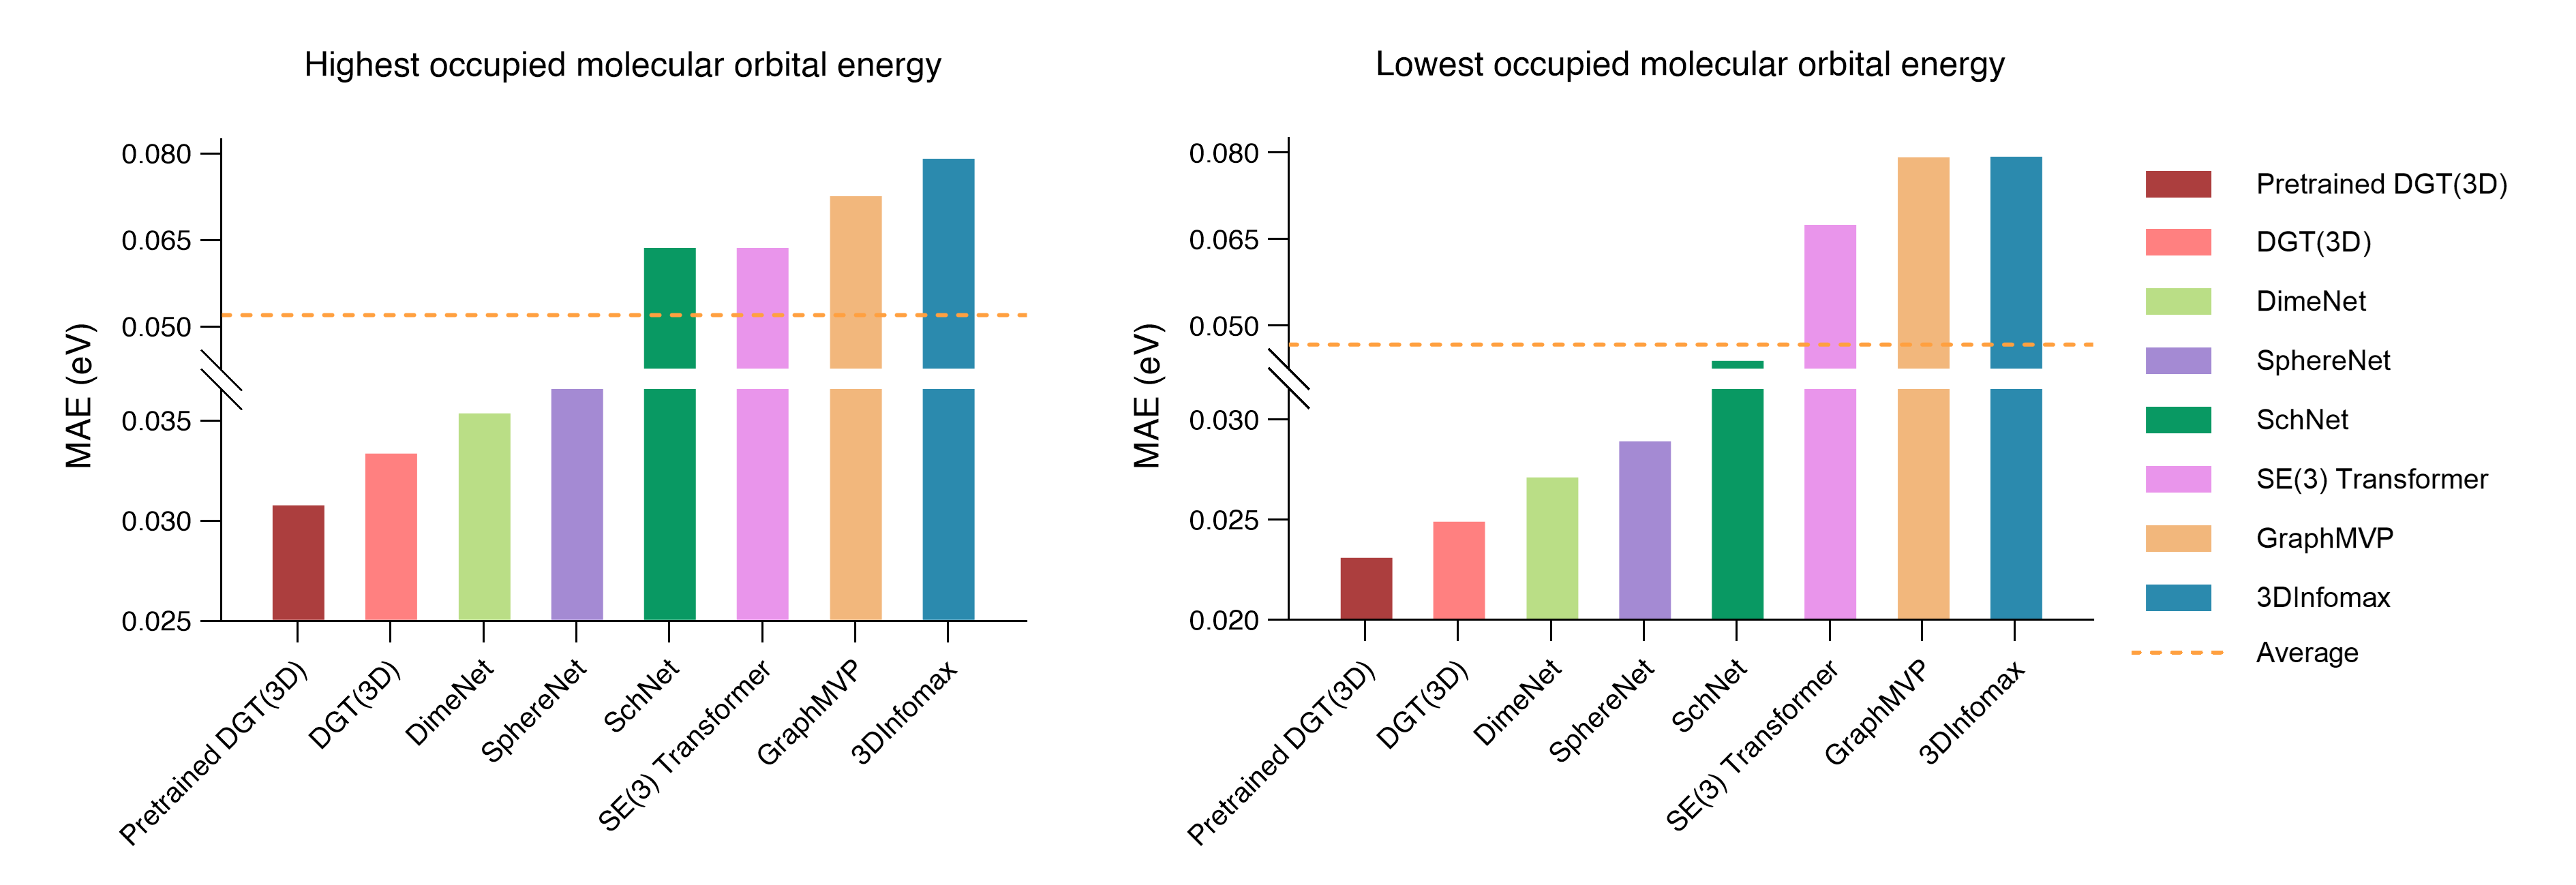


**Supplementary Fig. 8.** Detailed performance comparison of DGT(3D) against SchNet, DimeNet, SphereNet, SE(3) Transformer, GraphMVP, and 3DInfomax on HOMO and LUMO energy prediction tasks of the QM9 dataset.

# 9. Attention-based interpretation

We refer to the gradient self-attention maps method for interpreting the DGT model8. This method is capable of yielding ad-hoc explanations for attention-based models by deciphering which parts of the input correspond with the predictions. The importance value of the target w.r.t. the node can be given as:

where is are the element-wise gradients of w.r.t. to and is the Hadamard product. denotes the index of attention head, the index of node, the number of attention heads, and the number of nodes.

# References

1. Park, W., Chang, W.-G., Lee, D., Kim, J. & hwang, seung-won. GRPE: Relative Positional Encoding for Graph Transformer. in *ICLR2022 Machine Learning for Drug Discovery* (2022).

2. Zhu, J. *et al.* O-GNN: incorporating ring priors into molecular modeling. in *The Eleventh International Conference on Learning Representations* (2023).

3. Ying, C. *et al.* Do transformers really perform badly for graph representation? *Adv. Neural Inf. Process. Syst.* **34**, 28877–28888 (2021).

4. Menegaux, R., Jehanno, E., Selosse, M. & Mairal, J. Self-Attention in Colors: Another Take on Encoding Graph Structure in Transformers. *Trans. Mach. Learn. Res.* (2023).

5. Gasteiger, J., Yeshwanth, C. & Günnemann, S. Directional message passing on molecular graphs via synthetic coordinates. *Adv. Neural Inf. Process. Syst.* **34**, 15421–15433 (2021).

6. Wu, Z. *et al.* MoleculeNet: a benchmark for molecular machine learning. *Chem. Sci.* **9**, 513–530 (2018).

7. Hu, W. *et al.* OGB-LSC: A Large-Scale Challenge for Machine Learning on Graphs. *ArXiv Prepr. ArXiv210309430* (2021).

8. Barkan, O. *et al.* Grad-SAM: Explaining Transformers via Gradient Self-Attention Maps. in *Proceedings of the 30th ACM International Conference on Information & Knowledge Management* 2882–2887 (2021).
